# Supplementary material
Source: Springer Nature journal article supplement (https://www.springermedizin.de/resource/supplementary/12891_2012_1522_MOESM3_ESM.pdf/9508092)

## Heelstrike running

Slow running speed (N=14)

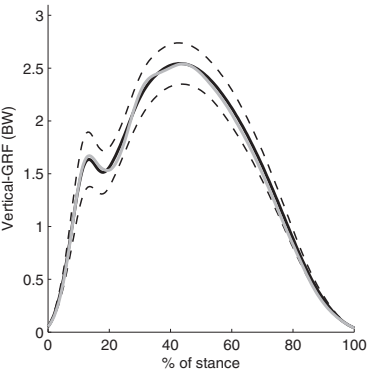

Preferred running speed (N=16)

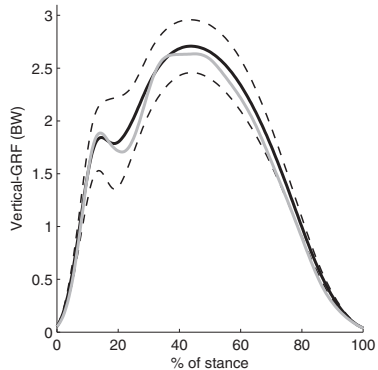

Fast running speed (N=12)

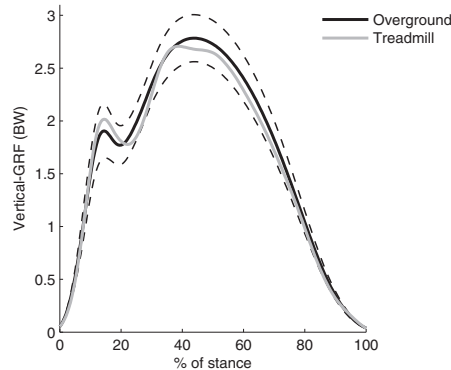

## Non-heelstrike running

Slow running speed (N=5)

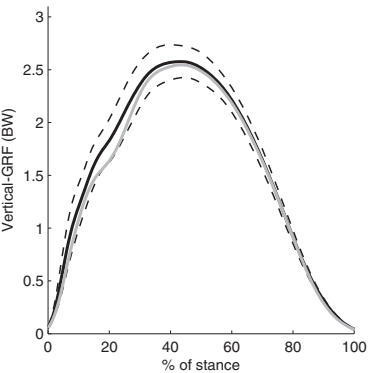

Preferred running speed (N=5)

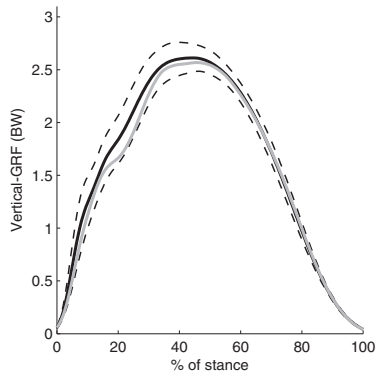

Fast running speed (N=6)

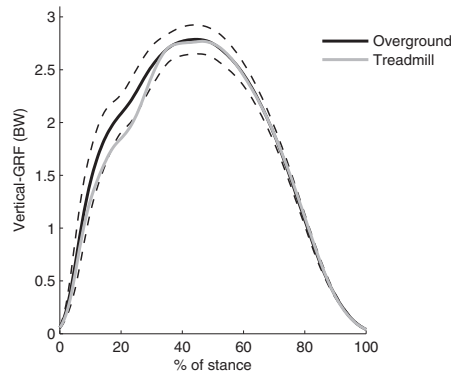

Supplement: MOESM3 [file 9508092]
